# Supplementary material for: 2D lanthanide MOFs driven by a rigid 3,5-bis(3-carboxy-phenyl)pyridine building block: solvothermal syntheses, structural features, and photoluminescence and sensing properties
Source: Royal Society of Chemistry journal article supplement (doi:10.1039/c6ce00885b), 2016-01-01
Supplement: c6ce00885b1.pdf [file c6ce00885b1.pdf]

## Electronic supporting information (ESI)

2D lanthanide MOFs driven by a rigid 3,5-bis(3-carboxy-phenyl)pyridine building block: solvothermal syntheses, structural features, photoluminescence and sensing properties

Li-Zi Yang,<sup>a</sup> Jun Wang,<sup>a</sup> Alexander M. Kirillov,<sup>b</sup> Wei Dou,<sup>a</sup> Cong Xu,<sup>a</sup> Ran Fang,<sup>a</sup> Cai-ling Xu,<sup>a</sup> Wei-Sheng Liu<sup>a\*</sup>

<sup>a</sup> *Key Laboratory of Nonferrous Metals Chemistry and Resources Utilization of Gansu Province and State Key Laboratory of Applied Organic Chemistry, Laboratory of Special Function Materials and Structure Design, Ministry of Education, College of Chemistry and Chemical Engineering, Lanzhou University, Lanzhou 730000, P. R. China*

<sup>b</sup> *Centro de Química Estrutural, Complexo I, Instituto Superior Técnico, Universidade de Lisboa, Av. Rovisco Pais, 1049-001, Lisbon, Portugal.*

E-mail: liuws@lzu.edu.cn(W.S. Liu)

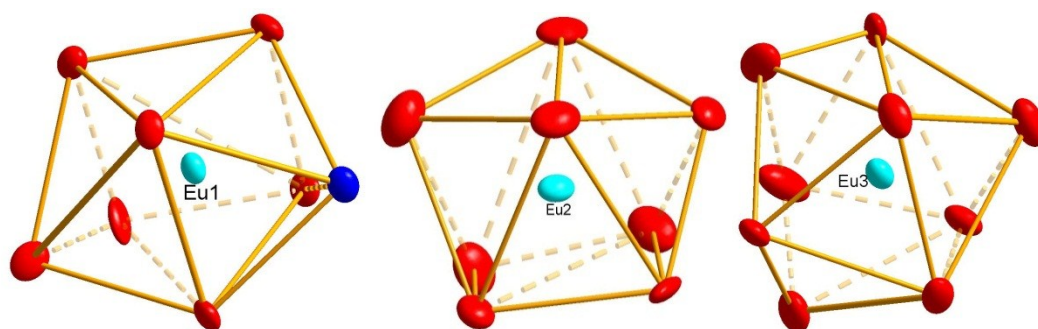

**Figure S1.** Simplified representation of coordination environments around Eu1, Eu2, and Eu3 centers in the structure of **1**.

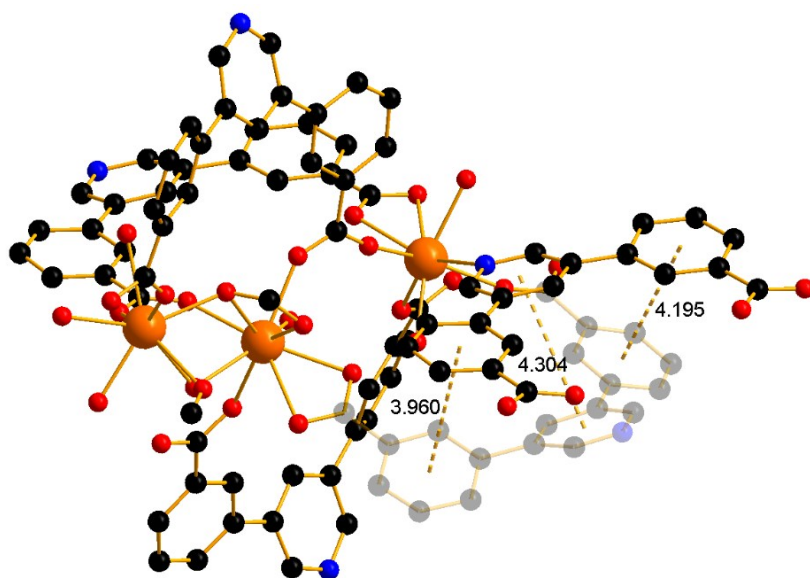

**Figure S2** The intramolecular  $\pi$ - $\pi$  stacking interactions in the compound **1**.

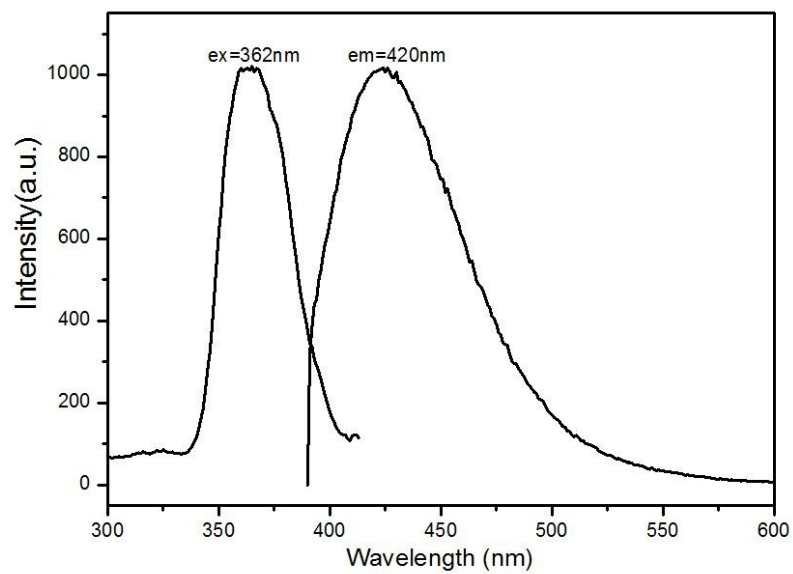

**Figure S3** Excitation ( $\lambda_{\text{ex}}=362$  nm) and emission ( $\lambda_{\text{em}}=420$  nm) spectra of compound **3** recorded on the crystalline sample at room temperature.

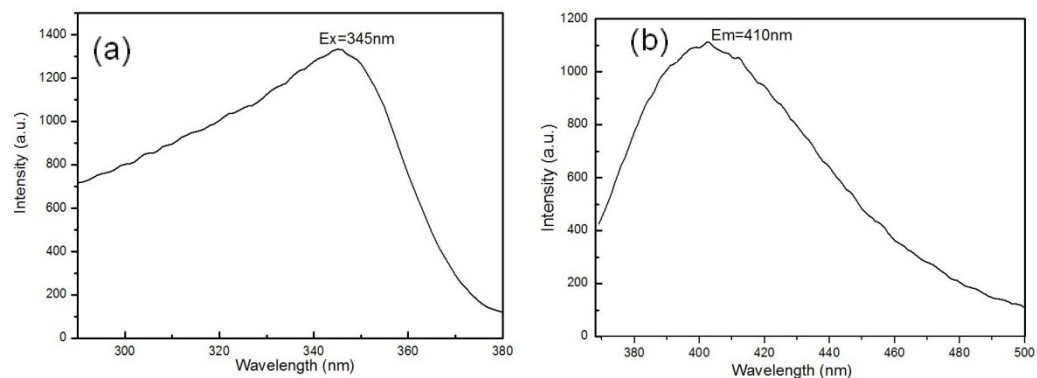

**Figure S4** (a) Solid-state excitation spectrum for H<sub>2</sub>bcpb in the solid state at room temperature; (b) Solid-state emission spectrum for H<sub>2</sub>bcpb in the solid state at room temperature

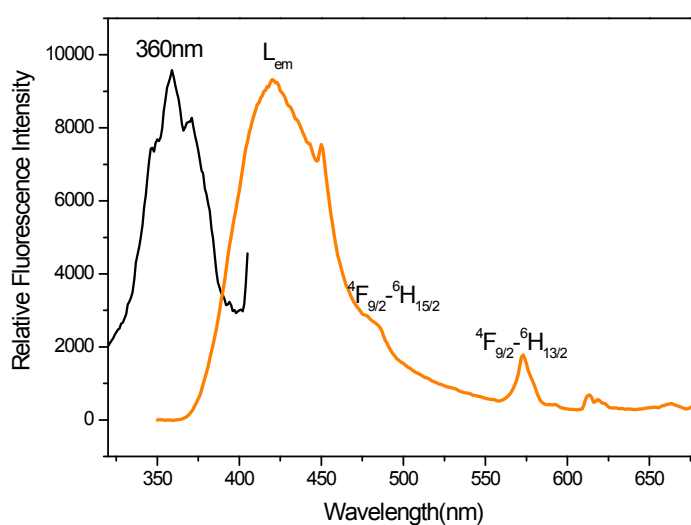

**Figure S5** Excitation (black,  $\lambda_{\text{ex}} = 360$  nm) and emission (orange,  $\lambda_{\text{em}} = 479$  and 574 nm) spectra of compound **4** recorded on the crystalline sample at room temperature.

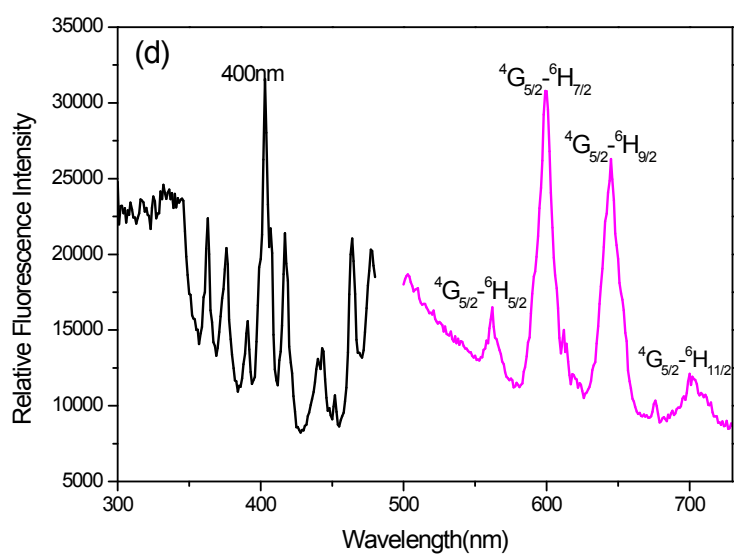

**Figure S6** Excitation (black,  $\lambda_{\text{ex}} = 400$  nm) and emission (purple,  $\lambda_{\text{em}} = 562$  and 596 nm, 642 and 703 nm) spectra of compound **5** recorded on the crystalline sample at room temperature.

**Table S1. The  $I_{\text{tot}}/I_{\text{MD}}$  calculation for compound 1.**

| Integral ranges   | Transitions | Integral    |                | $I_{\text{tot}}/I_{\text{MD}}$ |
|-------------------|-------------|-------------|----------------|--------------------------------|
|                   |             | intensities | Integral ratio |                                |
| 577-581 nm        | J = 0       | 175130      | 0.002712544    | 368.6575972                    |
| 583-603 nm        | J = 1       | 8095660     | 0.125391623    | 7.975014390                    |
| 605-638 nm        | J = 2       | 39264180    | 0.608152919    | 1.644323273                    |
| 647-657 nm        | J = 3       | 894355      | 0.013852437    | 72.18946056                    |
| 666-715 nm        | J = 4       | 15413530    | 0.238736254    | 4.188722829                    |
| Total integration |             | 64563005    |                |                                |

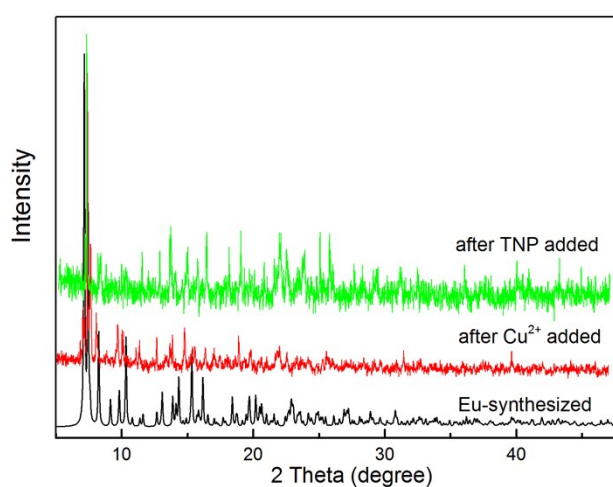

**Figure S7** PXRD patterns of **1** treated before and after the interaction with  $\text{Cu}(\text{NO}_3)_2$  or TNP.

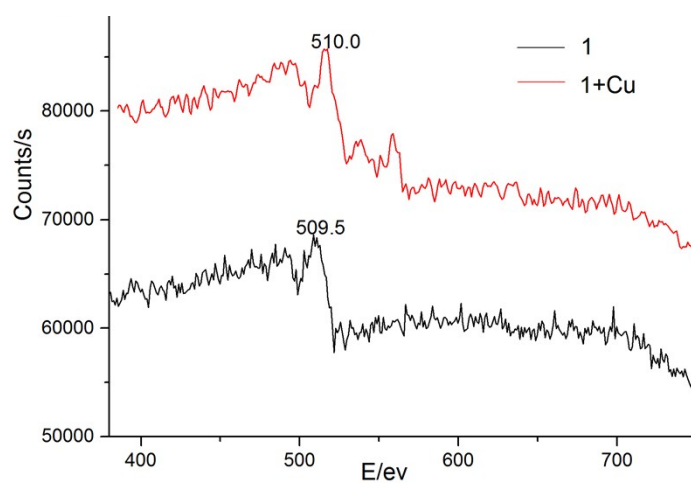

**Figure S8** The N1s XPS spectra of the original **1** and Cu-incorporated  $\text{Cu}^{2+}$ -**1** samples.

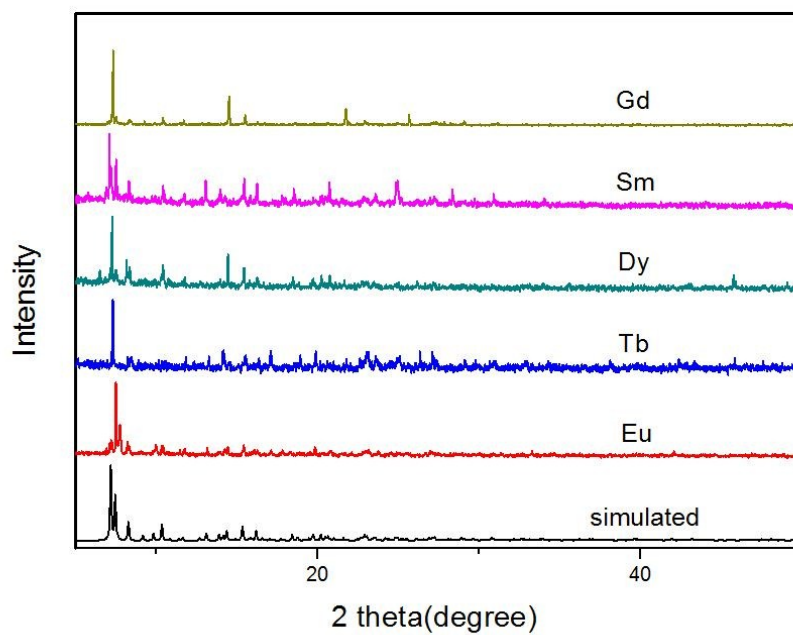

**Figure. S9** PXR D patterns of **1** (simulated from the single crystal X-ray data) and as-synthesized samples of **1–5**

**Table S2.** The molar ratio of the starting Tb/Eu salt and that in compounds  $[\text{Tb}_{3(1-x)}\text{Eu}_{3x}(\text{bcpb})_4(\mu\text{-HCOO})(\mu\text{-H}_2\text{O})(\text{H}_2\text{O})_2(\text{DEF})]_n$  (**2a–2j**) calculated by ICP analysis.

| Compound                                       | Molar ratio of the starting Tb/Eu salts | Molar Tb/Eu ratio in <b>2a–2j</b> calculated by ICP analysis |
|------------------------------------------------|-----------------------------------------|--------------------------------------------------------------|
| <b>2a</b> $\text{Tb}_{0.999}\text{Eu}_{0.001}$ | 1:0.001                                 | 1:0.0009                                                     |
| <b>2b</b> $\text{Tb}_{0.998}\text{Eu}_{0.002}$ | 1:0.002                                 | 1:0.0018                                                     |
| <b>2c</b> $\text{Tb}_{0.995}\text{Eu}_{0.003}$ | 1:0.003                                 | 1:0.0028                                                     |
| <b>2d</b> $\text{Tb}_{0.99}\text{Eu}_{0.01}$   | 1:0.01                                  | 1:0.0101                                                     |
| <b>2e</b> $\text{Tb}_{0.98}\text{Eu}_{0.02}$   | 1:0.02                                  | 1:0.0192                                                     |
| <b>2f</b> $\text{Tb}_{0.97}\text{Eu}_{0.03}$   | 1:0.03                                  | 1:0.0309                                                     |
| <b>2g</b> $\text{Tb}_{0.95}\text{Eu}_{0.04}$   | 1:0.04                                  | 1:0.0368                                                     |
| <b>2h</b> $\text{Tb}_{0.90}\text{Eu}_{0.10}$   | 1:0.10                                  | 1:0.1007                                                     |
| <b>2i</b> $\text{Tb}_{0.85}\text{Eu}_{0.15}$   | 1:0.15                                  | 1:0.1449                                                     |
| <b>2j</b> $\text{Tb}_{0.80}\text{Eu}_{0.20}$   | 1:0.20                                  | 1:0.2089                                                     |



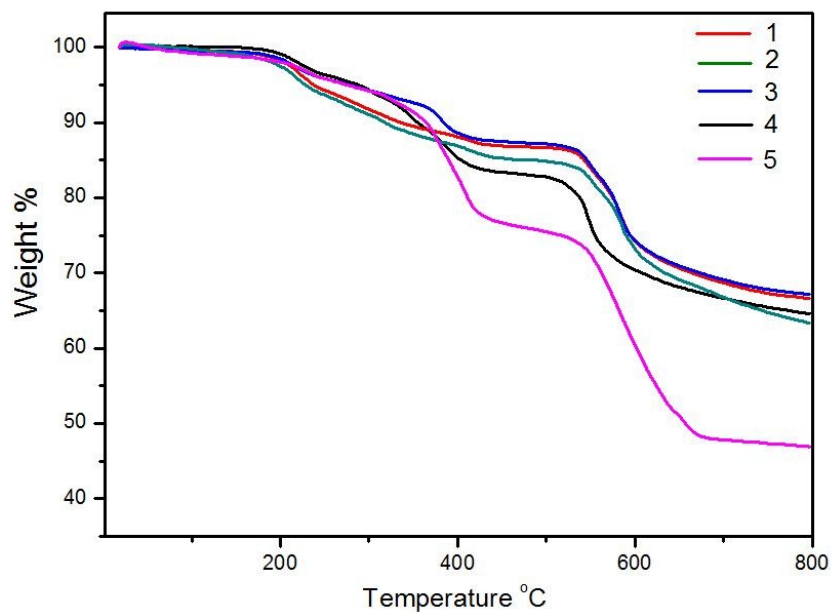

**Figure S10** TGA curves for compounds 1–5
